# Supplementary material for: Estimation of periodontal inflamed surface area by salivary lactate dehydrogenase level using a test kit
Source: Research Square preprint supplement (doi:10.21203/rs.3.rs-4018924/v1), 2024-03-21
Supplement: Supplementary file 1 [file 7e85e82421c84ffce4fff4f1.xlsx]

## Sheet: Table 1
Table 1. Characteristics of participants
Variable	Total (n = 110)
Sex
Male	37 (33.6%)
Female	73 (66.4%)
Age (years)	66.5 (53.0-75.0)
Past smoking	9 (8.2%)
Diabetes mellitus	6 (5.5%)
Medication	41 (37.3%)
Number of teeth present	26.0 (22.0-28.0)
Salivary LD level
1	10（9.1%）
2	15（13.6%）
3	22 (20.0%）
4	19（17.3%）
5	15（13.6%）
6	17（15.5%）
7	7（6.4%）
8	3（2.7%）
9	1（0.9%）
10	1（0.9%）
BOP sites	5.0（2.0-9.0）
BOP rate (%)	3.9（1.8-6.4）
Mean PPD (mm)	2.1（1.9-2.4）
PPD≥ 4 mm sites	3.0（0-10.3）
PPD≥ 4 mm rate (%)	2.4（0-7.6）
PPD≥ 6 mm sites	0（0-1.0）
PPD≥ 6 mm rate (%)	0（0-1.2）
PESA	974.0 (801.5-1168.0)
PESA-Japanese	1164.9 (882.3-1329.5)
PISA (mm2)	46.9 (19.4-95.0)
PISA-Japanese (mm2)	61.0 (24.8-116.1)
Data are expressed as numbers (%) or medians (25 - 75 percentiles).
BOP: bleeding on probing, LD: lactate dehydrogenase, PESA: periodontal epithelial surface area, PISA: periodontal inflamed surface area, PPD: probing pocket depth

## Sheet: Table 2
Table 2. Spearman's rank correlation analysis for salivary LD levels.
Variables	r	p value
Age, years	-0.011	0.912
Number of teeth present	-0.212	0.026
BOP sites	0.614	<0.001
BOP rate	0.626	<0.001
Mean PPD	0.254	0.008
PPD≥ 4 mm sites	0.257	0.007
PPD≥ 4mm rate	0.258	0.007
PPD≥ 6 mm sites	0.302	0.001
PPD≥ 6 mm rate	0.297	0.002
PESA	0.122	0.202
PESA-Japanese	0.062	0.522
PISA	0.56	<0.001
PISA-Japanese	0.581	<0.001
BOP: bleeding on probing, LD: lactate dehydrogenase, PESA: periodontal epithelial surface area, PISA: periodontal inflamed surface area, PPD: probing pocket depth

## Sheet: Table　3
Table 3. Factors associated with salivary LD level by multiple regression analysis with stepwise variable selection.
Model	Unstandardized coefficients（B）	95% CI for B		Standardized coefficients β	p value
Dependent variables		Lower bound	Upper bound
Model 1
BOP rate	0.118	0.068	0.169	0.407	<0.001
Model 2
Number of teeth present	-0.057	-0.122	0.008	-0.158	0.083
PISA	0.005	0.002	0.007	0.344	<0.001
Model 3
Number of teeth present	-0.061	-0.125	0.002	-0.168	0.056
PISA-Japanese	0.007	0.004	0.009	0.415	<0.001
BOP: bleeding on probing, CI: confidence interval, LD: lactate dehydrogenase, PISA: periodontal inflamed surface area
Model 1: Independent variables were sex, age, past smoking, medication, number of teeth present, and BOP rate.
Model 2: Independent variables were sex, age, past smoking, medication, number of teeth present, and PISA
Model 3: Independent variables were sex, age, past smoking, medication, number of teeth present, and PISA-Japanese.

## Sheet: Table 4
Table 4. Results of the multiple regression analysis with stepwise variable selection to estimate PISA with salivary LD levels and other variables.
Model	Independent variables	Unstandardized coefficients（B）	95% CI for B		Standardized coefficients β	p value	R2
Dependent variables			Lower bound	Upper bound
Model 1
PISA	Salivary LD level	22.787	10.475	35.099	0.326	<0.001	0.166
	Sex (male)	57.554	5.526	109.582	0.1988	0.03
	Age	-1.707	-3.642	0.227	-0.157	0.083
	Constant	80.125
Model 2
PISA-Japanese	Salivary LD level	25.068	14.234	35.901	0.395	<0.001	0.217
	Sex (men)	47.007	1.228	92.787	0.178	0.044
	Age	-1.833	-3.535	-0.131	-0.186	0.035
	Constant	91.707
BOP: bleeding on probing, CI: confidence interval, LD: lactate dehydrogenase, PISA: periodontal inflamed surface area
Models 1 and 2: Independent variables entered for each model were salivary LD level, sex, age, past smoking, medication, and number of teeth present.
